# Supplementary material
Source: PubMed Central journal article supplement (PMC6646132)
Supplement: ao8b00664_si_001.pdf [file ao8b00664_si_001.pdf]

# **Multifunctional CdSNPs@ZIF-8: Potential Antibacterial Agent against GFP-expressing *Escherichia coli* and *Staphylococcus aureus* and Efficient Photocatalyst for Degradation of Methylene Blue**

*Ankur Malik<sup>a</sup>, Mala Nath<sup>a\*</sup>, Shanid Mohiyuddin<sup>b</sup> and Gopinath Packirisamy<sup>b</sup>*

Author's affiliation: <sup>a</sup>Department of Chemistry, Indian Institute of Technology Roorkee

Postal address: Indian Institute of Technology Roorkee , Roorkee, Uttarakhand-247667, India.

Author's affiliation: <sup>b</sup>Department of Biotechnology, Indian Institute of Technology Roorkee

Postal address: Indian Institute of Technology Roorkee , Roorkee, Uttarakhand-247667, India.

\* Corresponding author. Tel. : +91 1332 285797; Fax: +91 1332 73560.

E-mail address: [malanfcy@iitr.ernet.in](mailto:malanfcy@iitr.ernet.in) (Mala Nath)

Keywords: Multi-core-shell composites, Photodegradation, Methylene Blue, *E. coli*, *S. aureus*

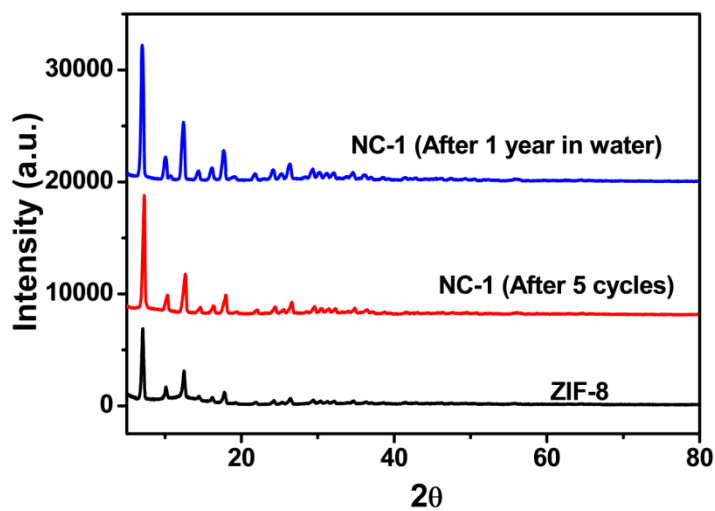

**Figure S1.** PXRD patterns of ZIF-8, NC-1 after 5 cycles of photocatalysis and NC-1 after keeping it in water for 1 year.

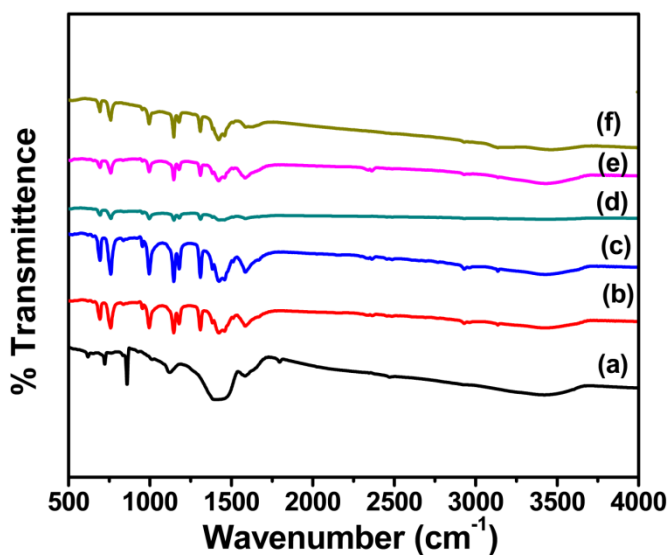

**Figure S-2** FTIR spectra of CdSNPs (a), ZIF-8 (b), NC-1 (c), NC-2 (d), NC-3 (e) and NC-1 after photocatalysis (f).

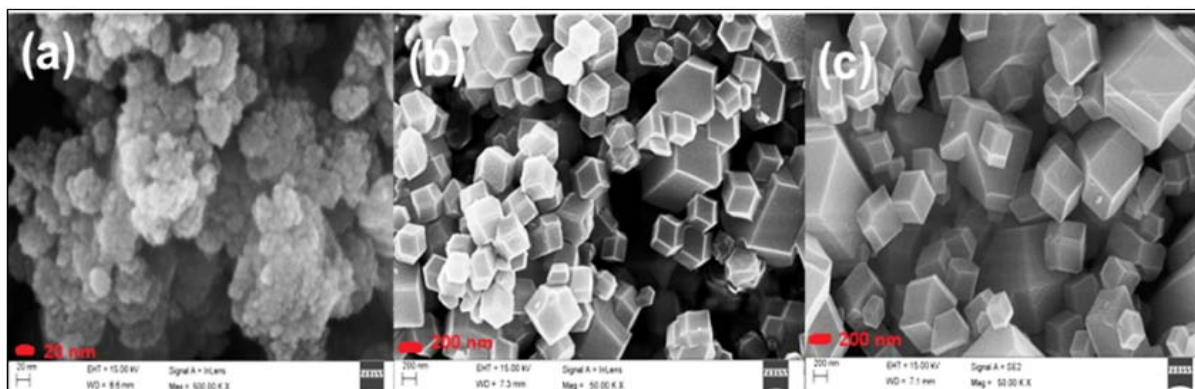

**Figure S3.** FE-SEM images of (a) CdSNPs; (b) ZIF-8 and (c) NC-1.

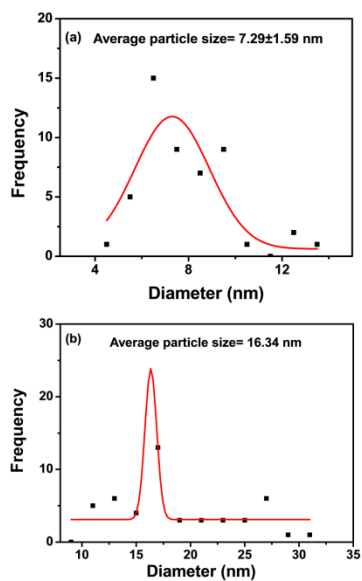

**Figure S4:** Particle size distribution plot of (a) CdSNPs and (b) CdSNPs encapsulated into NC-1 composite (by HRTEM).

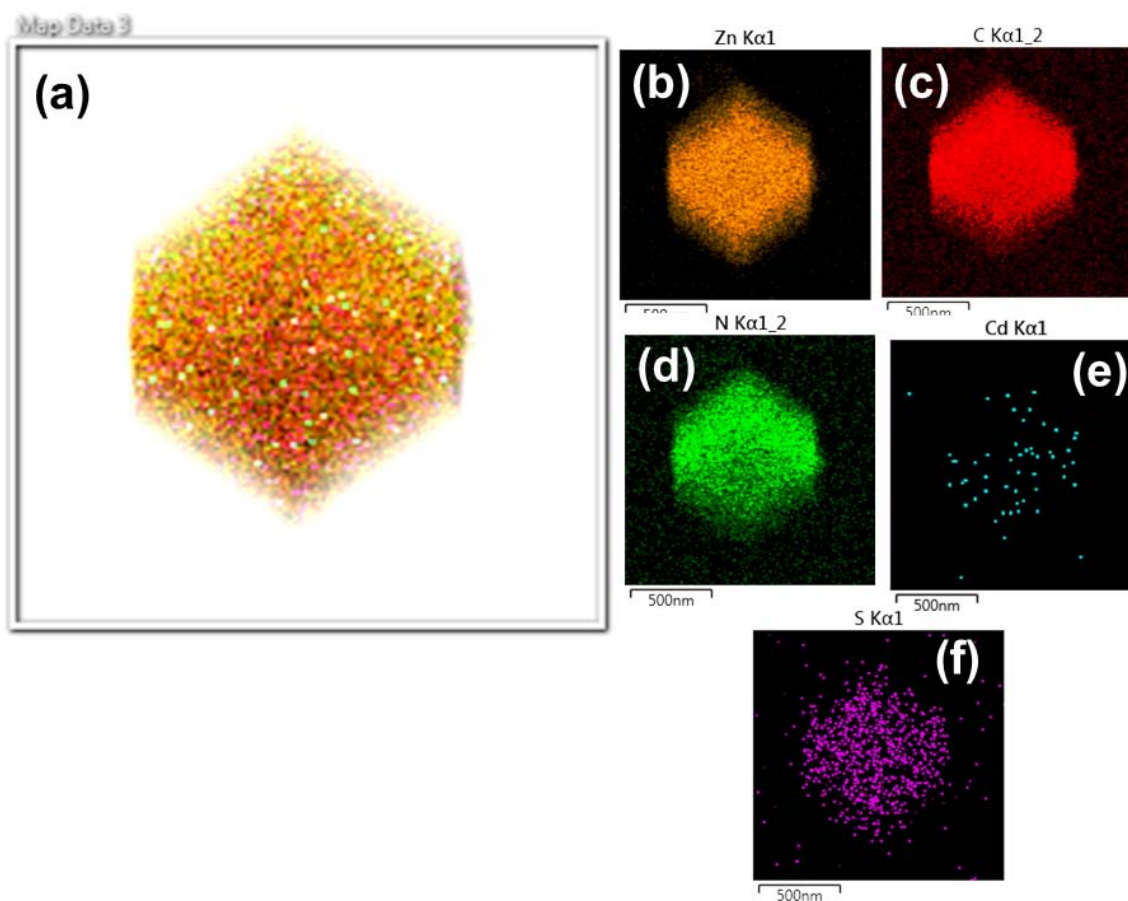

**Figure S5.** Elemental mapping of NC-1 (a) Layered Map, (b) Zn K $\alpha$ 1, (c) C K $\alpha$ 1, (d) N K $\alpha$ 1, (e) Cd K $\alpha$ 1 and (f) S K $\alpha$ 1.

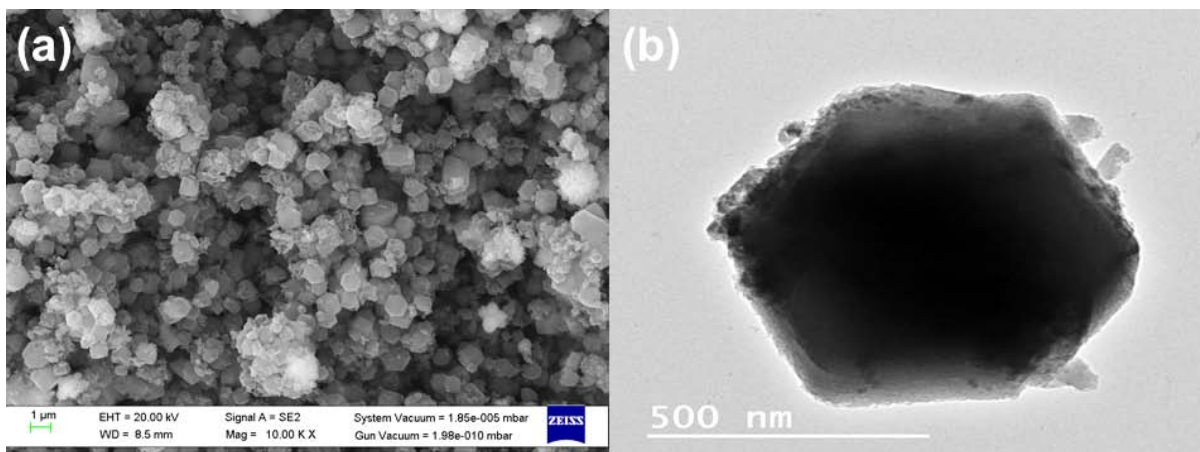

Figure S6. (a) FESEM images and (b) TEM images of NC-1 after photocatalytic degradation of MB..

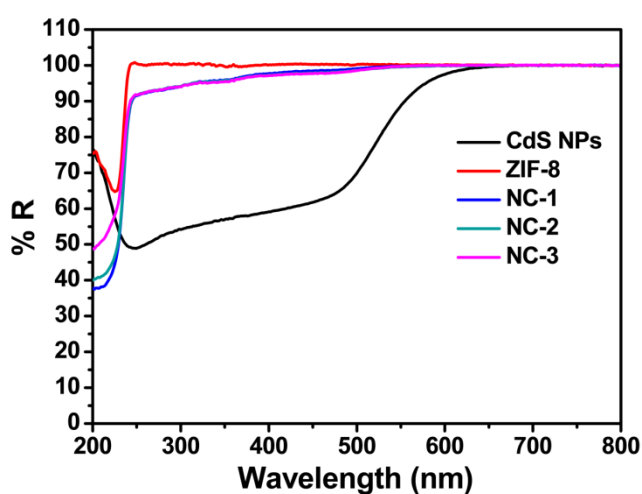

Figure S7. Reflectance spectra of CdSNPs, ZIF-8, NC-1, NC-2 and NC-3.

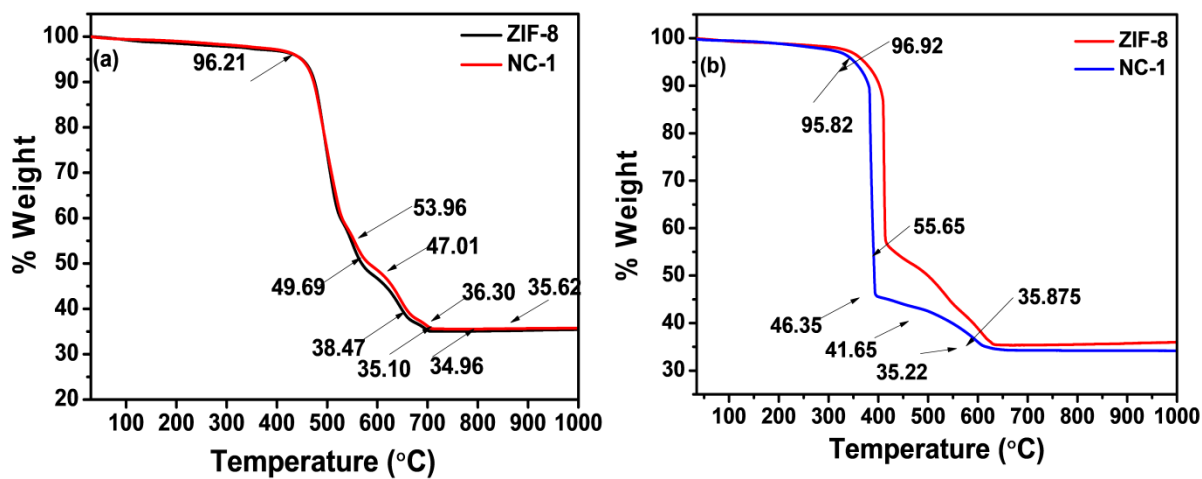

Figure S8. TGA plots of ZIF-8 and NC-1 (a) under nitrogen; (b) under air.

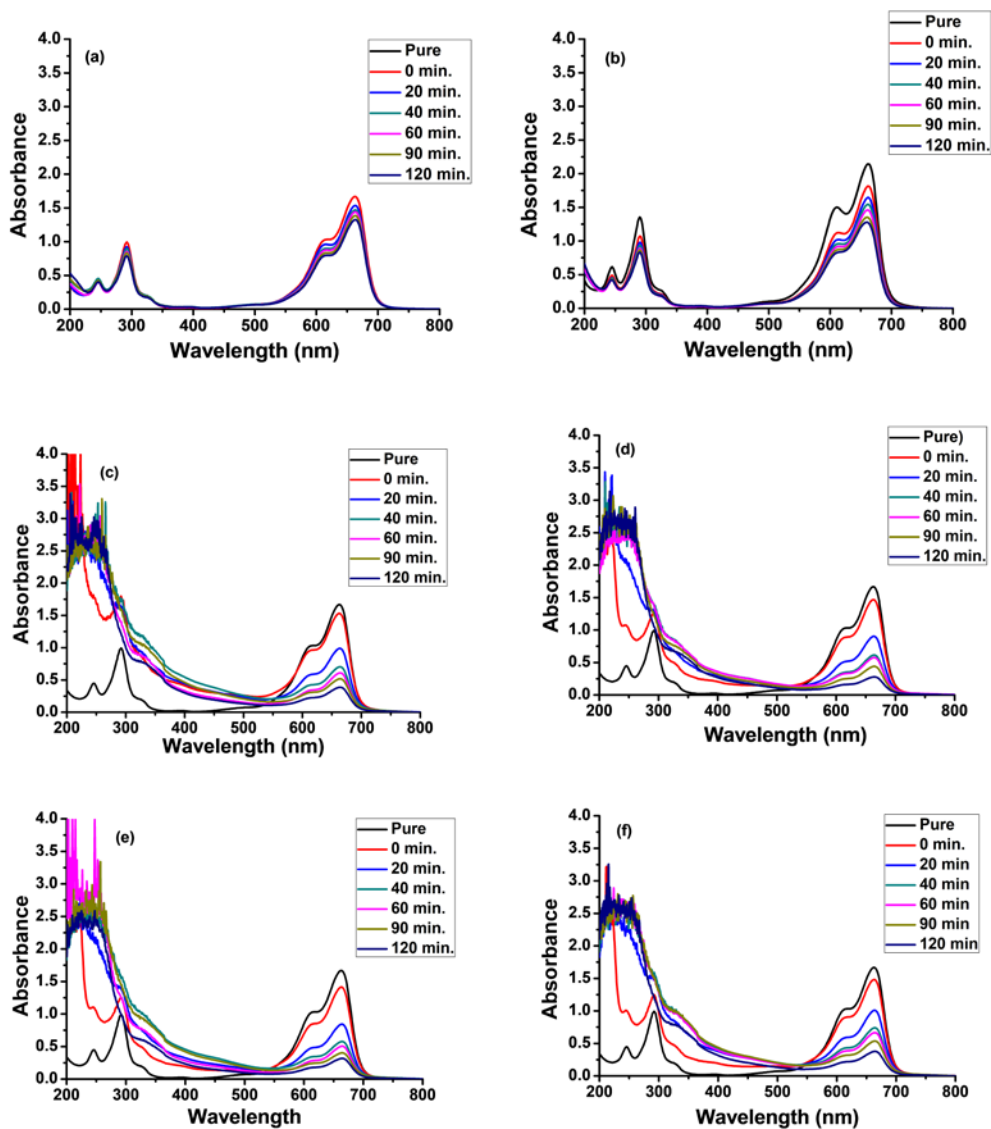

**Figure S9.1.** UV-Visible spectra for photodegradation study of methylene blue (a) pure 10 ppm MB, (b) CdSNPS, (c) ZIF-8, (d) NC-1, (e) NC-2 and (f) NC-3 at pH 6.85.

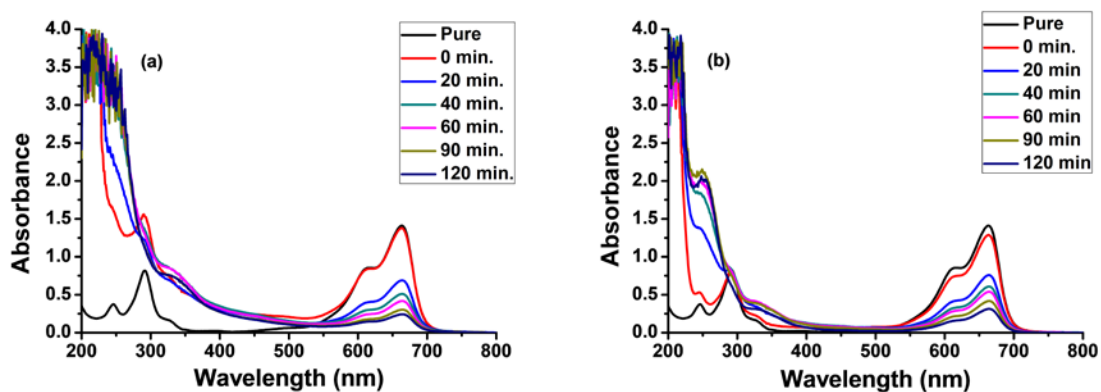

**Figure S9.2.** UV-Visible spectra for photodegradation study of methylene blue under UV-Visible by NC-1 with varying amount of catalyst (a) 5 mg, and (b) 15 mg.

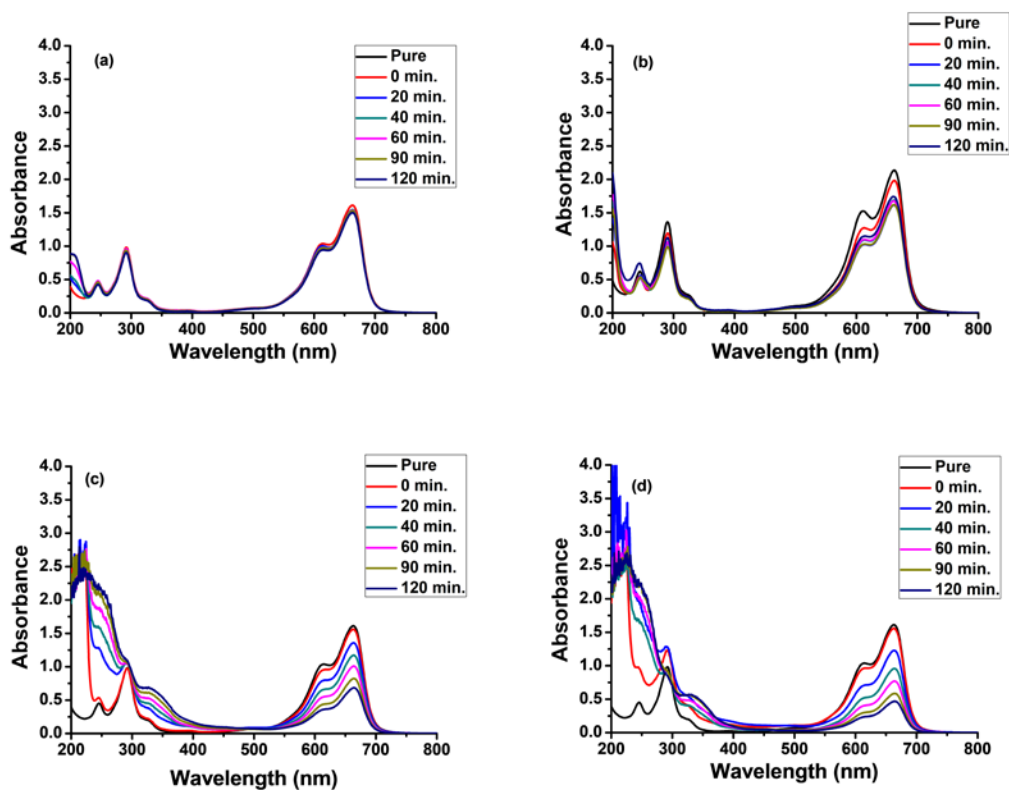

**Figure S9.3.** UV-Visible spectra for photodegradation study of methylene blue under UV-Visible at initial dye pH 3, (a) 10 ppm Pure MB, (b) CdSNPs (c) ZIF-8 and (d) NC-1.

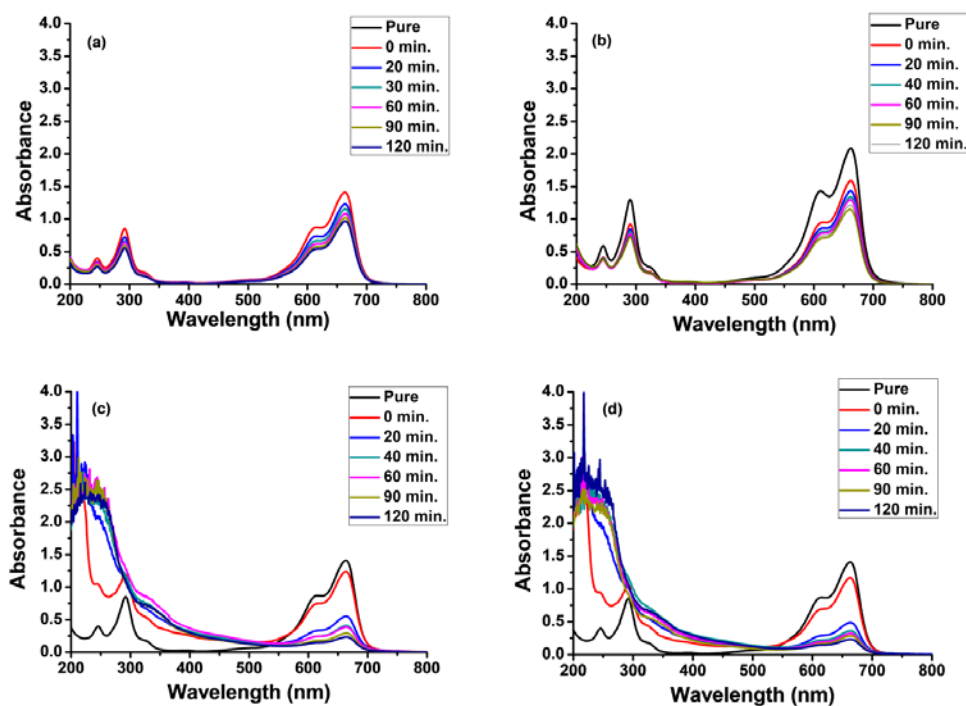

**Figure S9.4.** UV-Visible spectra for photodegradation study of methylene blue under UV-Visible at initial dye pH = 11 (a) 10 ppm Pure MB, (b) CdSNPs (c) ZIF-8 and (d) NC-1, respectively.



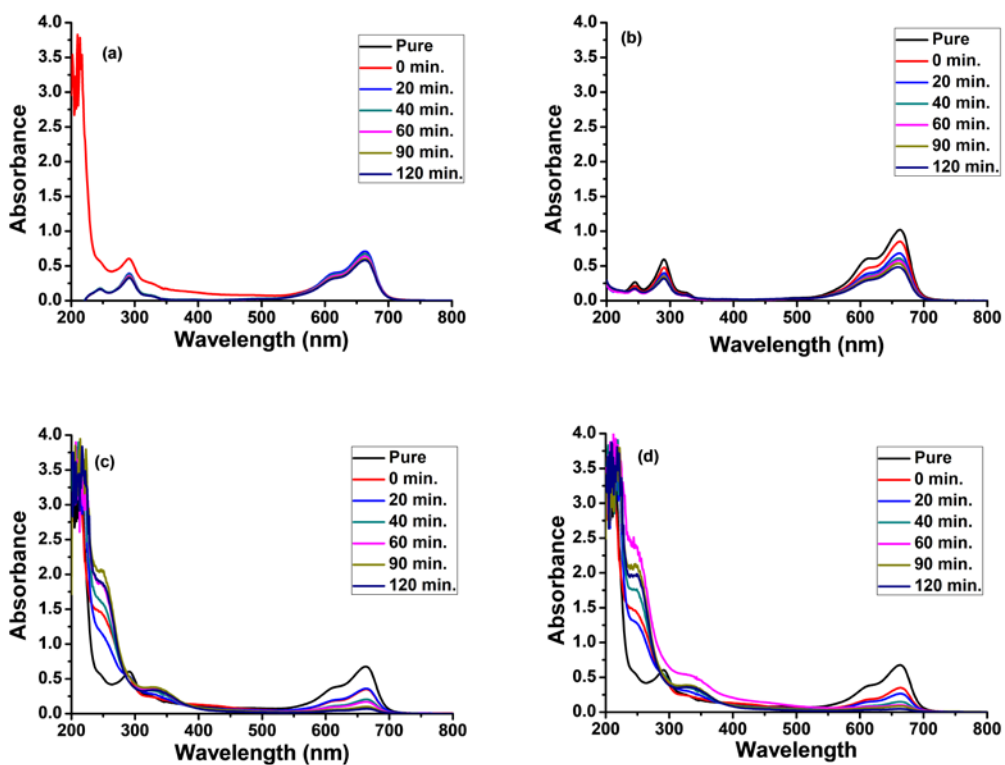

**Figure S9.5.** UV-Visible spectra for photodegradation study of methylene blue under UV-Visible at initial dye concentration = 5 ppm (a) 5 ppm Pure MB, (b) CdSNPs (c) ZIF-8 and (d) NC-1, respectively.

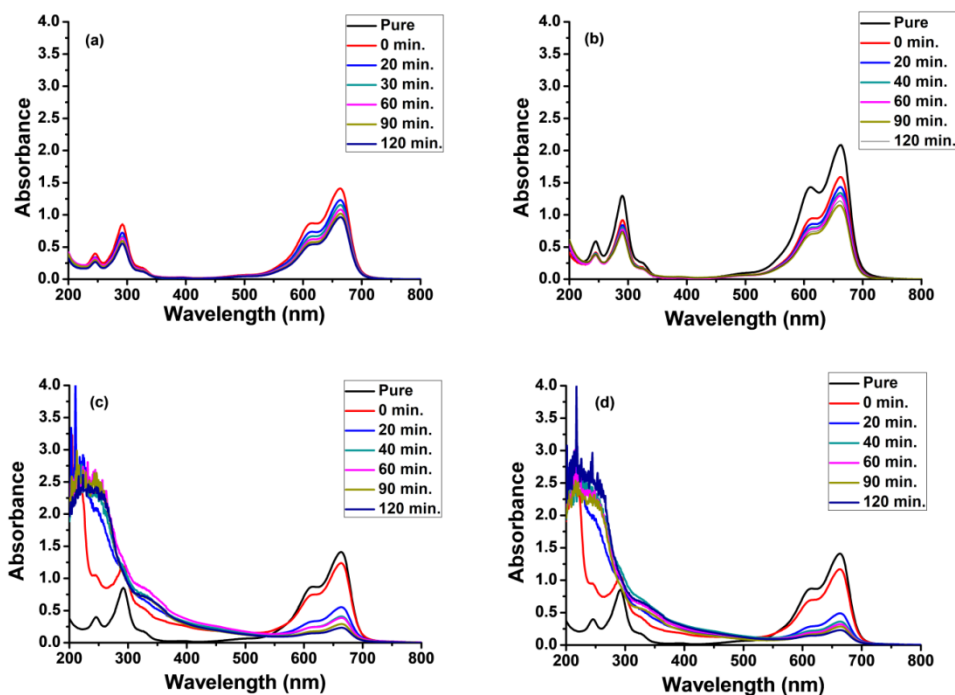

**Figure S9.6.** UV-Visible spectra for photodegradation study of methylene blue under UV-Visible at initial dye concentration = 15 ppm (a) 15 ppm Pure MB, (b) CdSNPs (c) ZIF-8 and (d) NC-1, respectively.

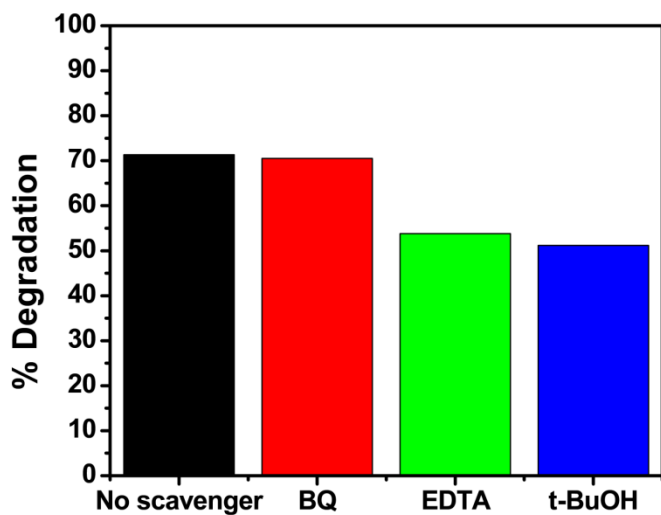

**Figure S10.** Photodegradation of MB using NC-1 as photocatalyst in presence of scavengers at pH = 7, [MB] = 10 ppm and amount of NC-1 = 5 mg; BQ = benzoquinone, EDTA= ethylenediaminetetraacetic acid, t-BuOH= t-butanol.

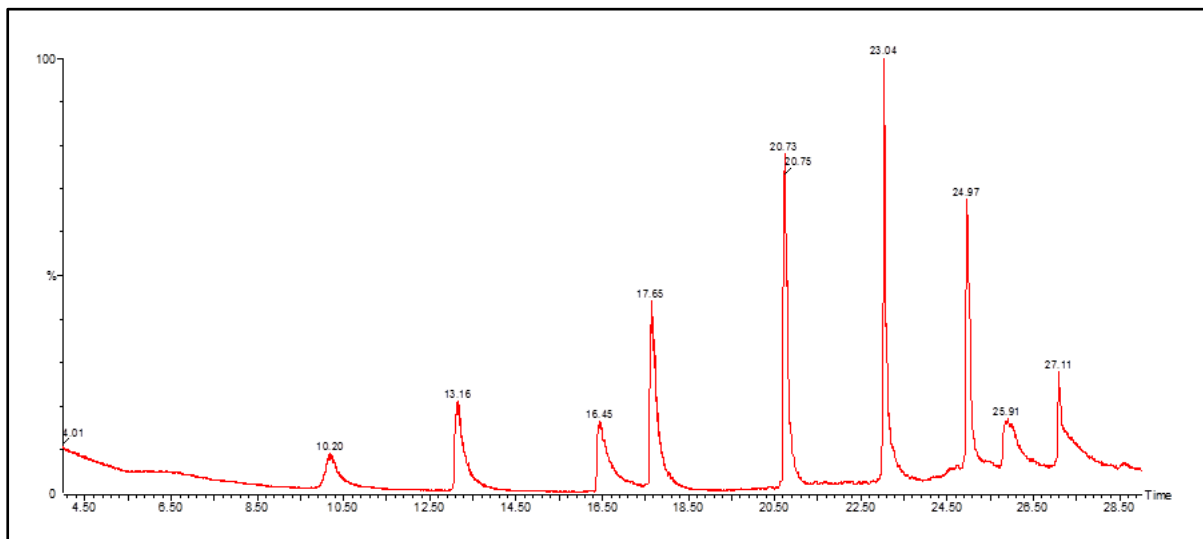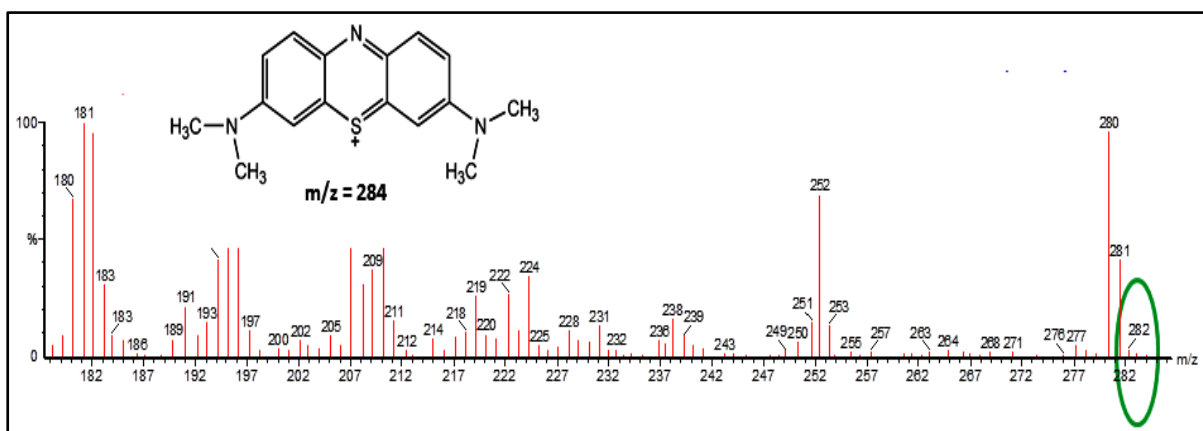

**Figure S11.1.** GC-MS spectra of intermediates and its fragments after photodegradation of MB.



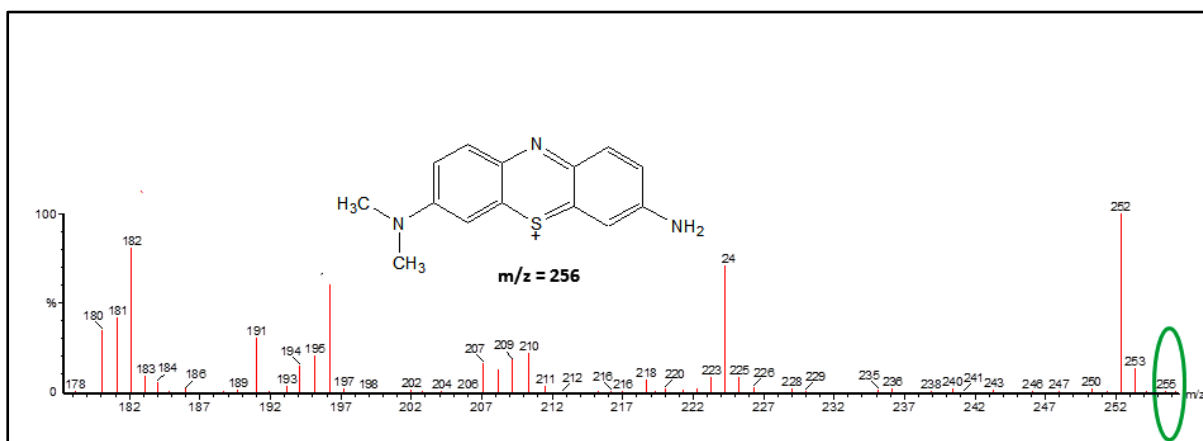

Figure S11.2. GC-MS spectra of intermediates and its fragments after photodegradation of MB.

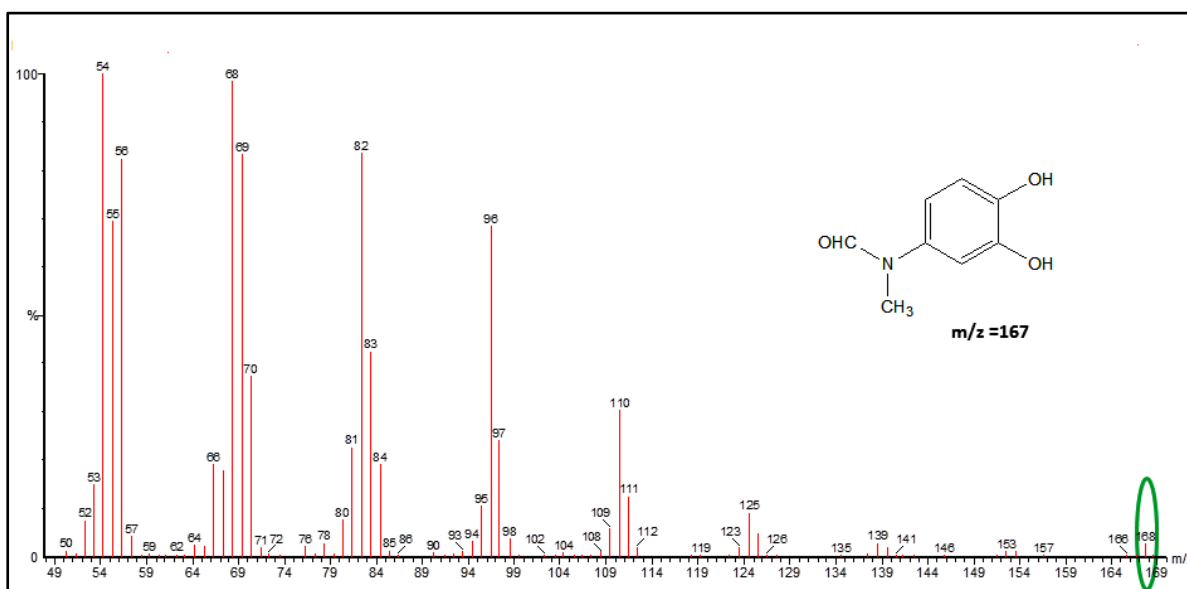

Figure S11.3. GC-MS spectra of intermediates and its fragments after photodegradation of MB.

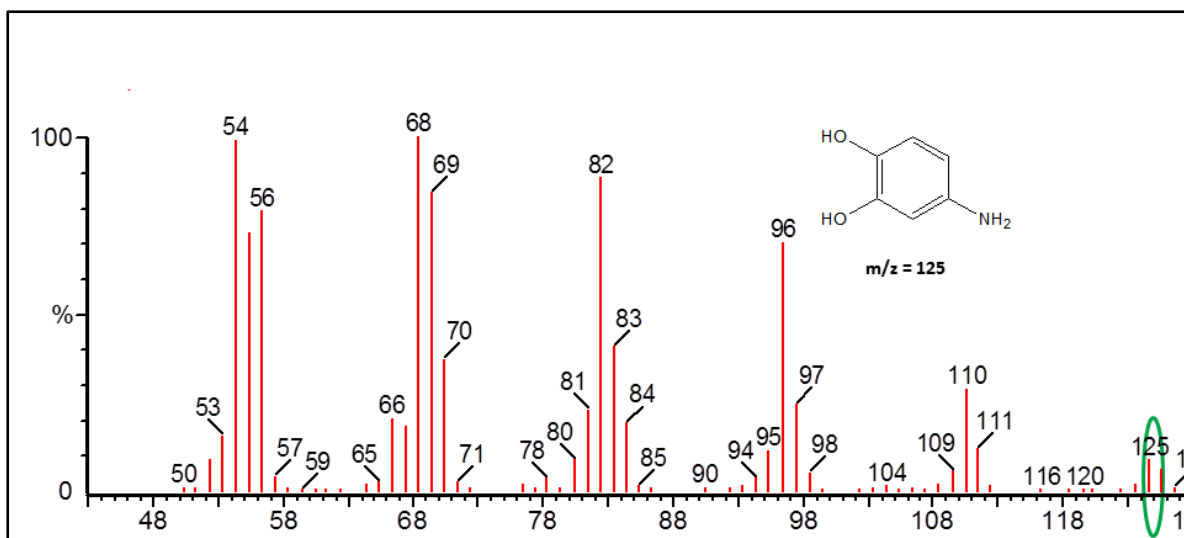

**Figure S11.4.** GC-MS spectra of intermediates and its fragments after photodegradation of MB.

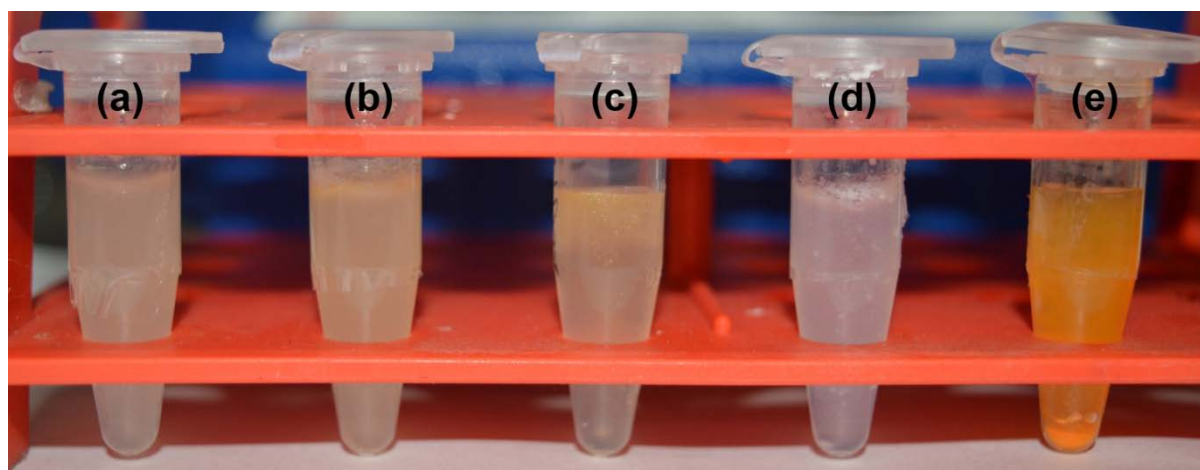

**Figure S12.** The aqueous dispersibility of (a,b,c) NC-1, NC-2, NC-3, respectively, (d) ZIF-8, and (e) CdS NPs at 20 mg/mL.

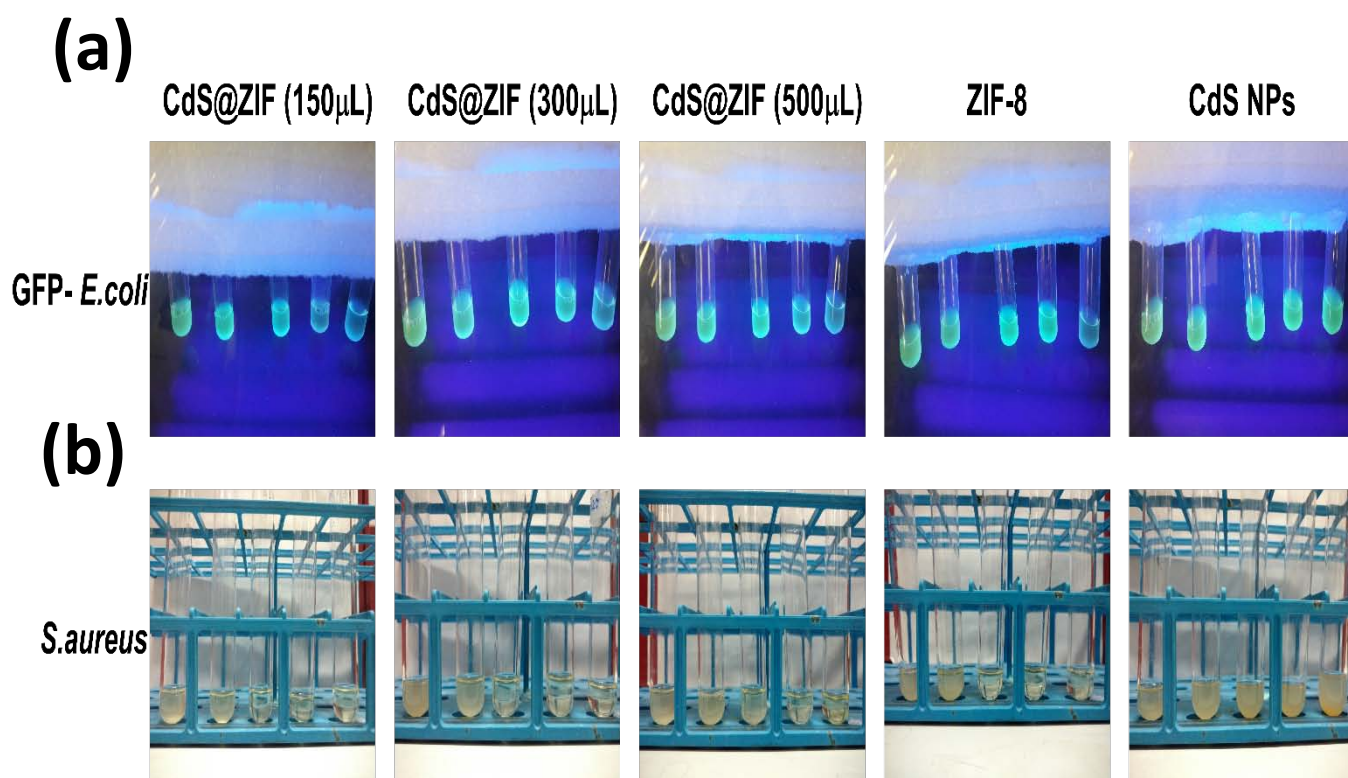

**Figure S13.** The UV illuminated GFP fluorescence photograph of (a) GFP *E.Coli* cells and digital photograph of (b) *S. aureus* after treatment of NC-1, NC-2, NC-3, ZIF-8, CdSNPs at various concentration.

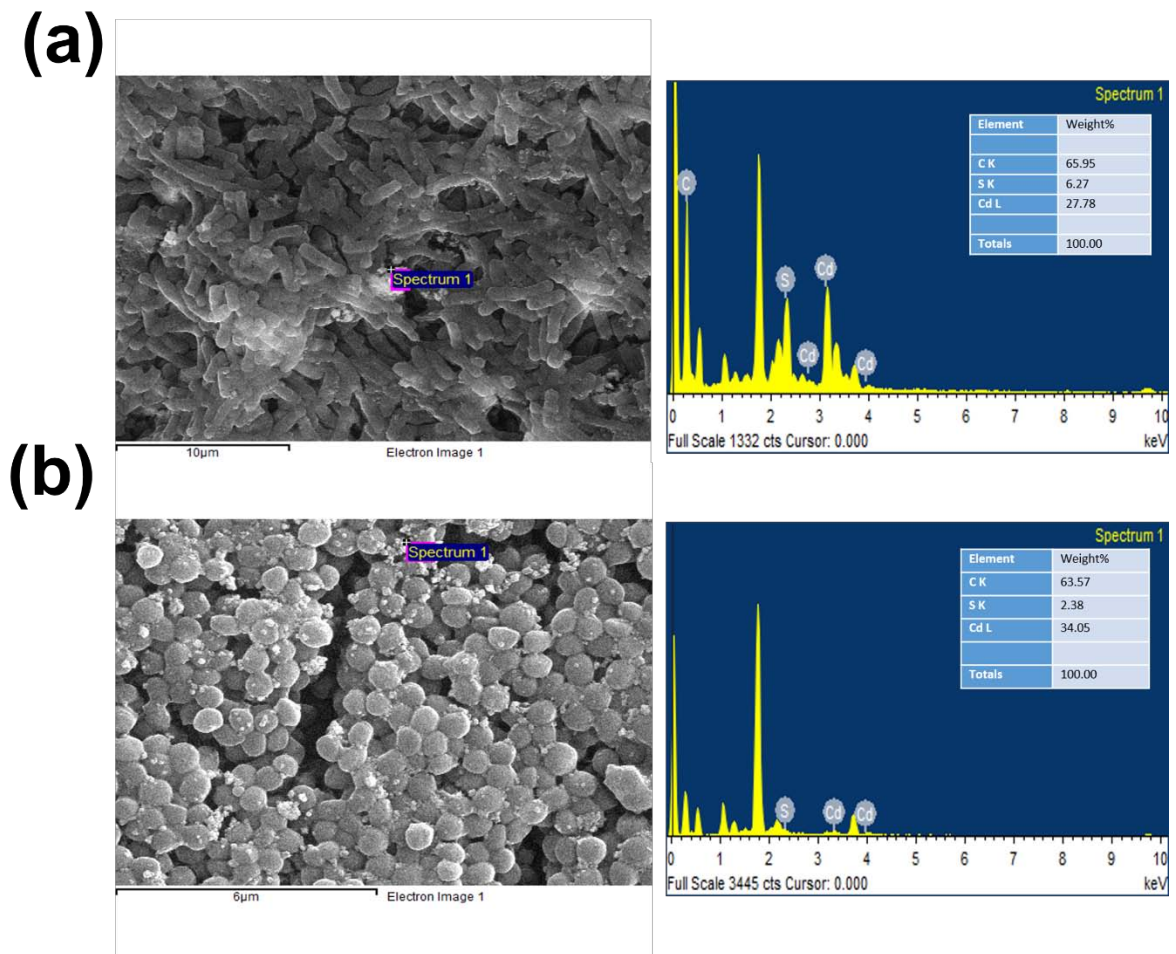

**Figure S14.** The Scanning Electron Micrograph of NC-1 treated (a) GFP *E.Colicells* and (b) *S.aureus* cells along with corresponding EDAX analysis.

**Table S1.** Surface area, pore volume and average pore size of CdS NPs, ZIF-8 and CdS@ZIF-8 (150  $\mu$ L) composite.

| Sample | Surface area ( $\text{m}^2\text{g}^{-1}$ ) | Pore volume ( $\text{cm}^3\text{g}^{-1}$ ) | Average pore size ( $\text{\AA}$ ) |
|--------|--------------------------------------------|--------------------------------------------|------------------------------------|
| CdSNPs | 34.51                                      | 0.005                                      | 29.83                              |
| ZIF-8  | 1296.22                                    | 0.732                                      | 36.26                              |
| NC-1   | 1294.15                                    | 0.753                                      | 11.64                              |

**Table S2.** Effect of amount of CdSNPs encapsulated in ZIF-8 for adsorption in dark (after 60 min) and photodegradation (after 120 min) of [MB] (10 ppm); pH 6.85; 10 mg of catalyst.

| S. No. | Catalyst | Adsorption (%) | Photo-degradation (%) | Total dye removal (%) |
|--------|----------|----------------|-----------------------|-----------------------|
| 1      | None     | 0              | 20.6                  | 20.6                  |
| 2      | CdS      | 15.5           | 25.5                  | 41.0                  |
| 3      | ZIF-8    | 8.2            | 68.4                  | 76.6                  |
| 4      | NC-1     | 11.9           | 71.3                  | 83.2                  |
| 5      | NC-2     | 11.6           | 69.5                  | 81.1                  |
| 6      | NC-3     | 11.2           | 66.1                  | 77.3                  |

**Table S3.** Effect of pH; Experimental conditions: 10 mg of ZIF-8 or NC-1; Amount of CdSNPs equivalent to that present in its 150  $\mu$ L suspension; [MB] = 10 ppm; time length: 60 min for adsorption in dark and 120 min in light.

| pH | Catalyst | Adsorption (%) | Photodegradation (%) | Total dye removal (%) |
|----|----------|----------------|----------------------|-----------------------|
| 3  | None     | 0              | 6.8                  | 6.8                   |
| 3  | CdS      | 7.1            | 17.4                 | 24.5                  |
| 3  | ZIF-8    | 3.0            | 54.7                 | 57.7                  |
| 3  | NC-1     | 2.87           | 68.2                 | 71.0                  |
| 11 | None     | 0              | 31.6                 | 31.6                  |
| 11 | CdS      | 24.0           | 21.2                 | 45.5                  |
| 11 | ZIF-8    | 12.2           | 71.5                 | 83.7                  |
| 11 | NC-1     | 17.1           | 66.5                 | 83.6                  |

**Table S4.** Effect of catalyst's (NC-1) amount; Experimental conditions: [MB] = 10 ppm; pH 11; time length: 60 min for adsorption in dark and 120 min in light; Ph 11.0.

| S.R. | Amount (mg) | Adsorption (%) | Photodegradation (%) | Total dye removal (%) |
|------|-------------|----------------|----------------------|-----------------------|
| 1    | 5           | 2.1            | 80.8                 | 82.9                  |
| 2    | 10          | 17.1           | 66.5                 | 83.6                  |
| 3    | 15          | 8.83           | 69.1                 | 77.9                  |

**Table S5.** Effect of initial dye concentration; Experimental conditions: 5 mg of ZIF-8 or (NC-1); Amount of CdSNPs equivalent to that present in its 150  $\mu$ L suspension; pH 11.0; time length: 60 min for adsorption in dark and 120 min in light.

| [MB] (ppm) | Catalyst | Adsorption (%) | Photo-degradation (%) | Total dye removal (%) |
|------------|----------|----------------|-----------------------|-----------------------|
| 5          | Pure     | 0              | 13.9                  | 13.9                  |
| 5          | CdS      | 16.4           | 36.8                  | 53.2                  |
| 5          | ZIF-8    | 0              | 89.6                  | 89.6                  |
| 5          | NC-1     | 0              | 93.2                  | 93.2                  |
| 15         | Pure     | 0              | 14.0                  | 14.0                  |
| 15         | CdS      | 7.5            | 25.3                  | 32.8                  |
| 15         | ZIF-8    | 9.3            | 68.3                  | 77.6                  |
| 15         | NC-1     | 10.2           | 71.3                  | 81.5                  |

**Table S6.** GC-MS analysis of possible fragments of MB after its degradation

| S. N. | m/z | Retention time (sec.) | Identified intermediates                      | Structure                                                                             |
|-------|-----|-----------------------|-----------------------------------------------|---------------------------------------------------------------------------------------|
| 1.    | 283 | 23.08                 | Methylene Blue                                | 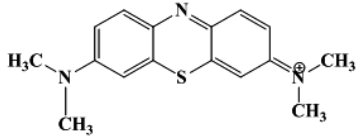   |
| 2.    | 256 | 20.72                 | 3-ammino-7-(dimethylammino)phenothiazin-5-ium |   |
| 3.    | 167 | 10.22                 | N-(3,4-dihydroxyphenyl)-N-methylformamide     |  |
| 4.    | 125 | 13.16                 | 4-aminobenzene-1,2-diol                       |  |
